# Supplementary material for: Genotyping of non-human primate models: perspectives and challenges for the implementation of the &quot;three R's&quot;
Source: Copernicus journal article supplement (doi:10.5194/pb-1-1-2014), 2014-10-15
Supplement: Supplementary file 1 [file pb-1-1-2014-supplement.pdf]

Supplement of Primate Biol., 1, 1–9, 2014  
<http://www.primate-biol.net/1/1/2014/>  
doi:10.5194/pb-1-1-2014-supplement  
© Author(s) 2014. CC Attribution 3.0 License.

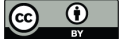

Primate  
Biology  Open Access

*Supplement of*

## **Genotyping of non-human primate models: perspectives and challenges for the implementation of the “three R’s”**

**T. Haus et al.**

*Correspondence to:* T. Haus (thaus@dpz.eu)

## Items of the Online Survey

**1. Are the native countries of origin known for the primates *housed* at your facility?**

- Yes.
- No.
- Not of all individuals.
- I do not know.
- We do not house primates.

**2. Are the native countries of origin known for your *test animals*?**

- Yes.
- No.
- Not of all individuals.
- I do not know.
- I do not conduct experiments with primates.

**3. Are there hybrid animals between different species at your facility?**

- No, we keep/breed only pure species.
- Yes, we have hybrids.
- We are not aware of hybrids.
- I do not know.
- We do not house primates.

**4. Are hybrids between different species used for experiments at your facility?**

- No, we use only pure-bred species.
- Yes, we also use hybrids.
- We are not aware of hybrids.
- We do not conduct experiments with primates.
- I do not know.

**5. Do you prefer animals from specific geographic regions/populations for your experiments?**

- Yes.
- No.
- No, but we consider specific species.
- We do not conduct experiments with primates.

**6. Does your facility maintain pure breeding lineages from specific geographic regions/populations by selective breeding/purchasing?**

- Yes.
- No.
- No, but we purchase/breed only pure species.
- I do not know.
- We do not house primates.

## 7. Do you genotype animals housed at your facility?

If appropriate, you can choose more than one answer within a category.

Yes, we genotype all individuals of our facility

- to detect potential hybrids.
- to determine (sub)species/geographic origin.
- to determine haplo-/genotypes.

Yes, we genotype individuals of certain genera/species

- to detect potential hybrids.
- to determine (sub)species/geographic origin.
- to determine haplo-/genotypes.
- No.
- We do not house primates at our facility.
- I do not know.

### 7b. You have chosen “Yes, we genotype individuals of certain genera/species”. Please indicate which genera and if appropriate name also the species.

You can name more than one species by comma separation.

*Macaca* \_\_\_\_\_

*Chlorocebus* \_\_\_\_\_

*Papio* \_\_\_\_\_

*Callithrix* \_\_\_\_\_

*Aotus* \_\_\_\_\_

*Saimiri* \_\_\_\_\_

Other: \_\_\_\_\_

No specification

## 8. Do you genotype test animals prior to your experiments?

If appropriate, you can choose more than one answer within a category.

Yes, always

- to detect potential hybrids.
- to determine (sub)species/geographic origin.
- to determine haplo-/genotypes.

Yes, depending on the experiment

- to detect potential hybrids.
- to determine (sub)species/geographic origin.
- to determine haplo-/genotypes.
- No.
- I do not conduct experiments with primates.

**8b. You have chosen “Yes, we genotype test animals depending on the experiment.” Please specify in which research area(s) you use to genotype test animals prior to the experiment.**

- Neurosciences
- Infectious diseases
- Vaccine development
- Drug efficacy/safety testing
- Others: \_\_\_\_\_
- No specification.

**9. Do you think there are possible hindrances or limiting factors in conducting genotyping of breeding and test animals?**

Yes,

- limited budget
- cost benefit ratio too high
- limited time
- limited staff
- other factors: \_\_\_\_\_
- No.
- I do not know.

**10. Do you think there are factors that might impede the implementation of genotyping results in primate research, breeding or husbandry?**

Yes, there might be difficulties with

- selective breeding (e.g., artificial insemination, group housing).
- maintenance of genetic diversity.
- limited number of individuals with a specific genotype.
- other difficulties: \_\_\_\_\_
- No.
- I do not know.
- Further comments: \_\_\_\_\_

**11. Several researchers argue that genotyping prior to experiments would reduce the number of test animals and at the same time improve the reliability and quality of the results.**

- I agree.
- I disagree.
- I do not have an opinion.
- comment (optional): \_\_\_\_\_

**12. Have you ever experienced an influence of genetic variation in non-human primates on your experimental approaches or results?**

- Yes.
- No.
- We did not test this before.
- I do not conduct experiments with primates.

**12b. You already experienced an influence of genetic variation on your experimental approaches or results. Please specify in which discipline(s).**

- Infectious diseases
- Neurosciences
- Drug efficacy/safety testing
- Vaccine development
- Other: \_\_\_\_\_
- No specification

**13. If you would conduct genotyping, which method(s) would you prefer?**

You are allowed to choose more than one option.

- Whole-genome sequencing
- Whole-exome sequencing
- Single Nucleotide Polymorphism (SNP) genotyping
- Short Tandem Repeats (STR) genotyping
- Mitochondrial DNA analysis
- Y-chromosomal DNA analysis
- Major histocompatibility complex (MHC) genotyping
- Other method(s): \_\_\_\_\_
- I have no opinion.

**Questions - Background data**

**A. What is your current position?**

This information is really important for the analysis of the data!

You can choose more than one option.

- Researcher
- Breeding/colony manager
- Primate husbandry/welfare
- Project/product manager
- Veterinarian
- Other: \_\_\_\_\_
- No specification

**B. In what kind of institution/department do you work?**

You can choose more than one option.

- Pharmaceutical industry/research contract
- Academic/research institute
- Breeding facility
- Other: \_\_\_\_\_
- No specification

**C. Where is your facility located?**

- North America
- South America
- Europe
- China
- India
- Southeast Asia
- Africa
- Mauritius
- No specification

**D. Which primate genera are housed at your facility?**

Please tick for each genus.

- Macaca*
- Chlorocebus*
- Papio*
- Callithrix*
- Aotus*
- Saimiri*
- Other: \_\_\_\_\_
- No specification
- We do not house primates.

**E. Which primate genera do you use for your experiments?**

Please tick for each genus.

- Macaca*
- Chlorocebus*
- Papio*
- Callithrix*
- Aotus*
- Saimiri*
- Other: \_\_\_\_\_
- No specification
- I do not conduct experiments with primates.

**F. How many animals do you house at your institute?**

Please choose the appropriate category.

- <100
- >101
- I do not know.
- We do not house primates.
- No specification
